# Supplementary material
Source: PubMed Central journal article supplement (PMC4160465)
Supplement: NIHMS619714-supplement-Supp_FigureS1-S3.pdf [file NIHMS619714-supplement-Supp_FigureS1-S3.pdf]

# Supplementary Data

## Supplement Figure 1

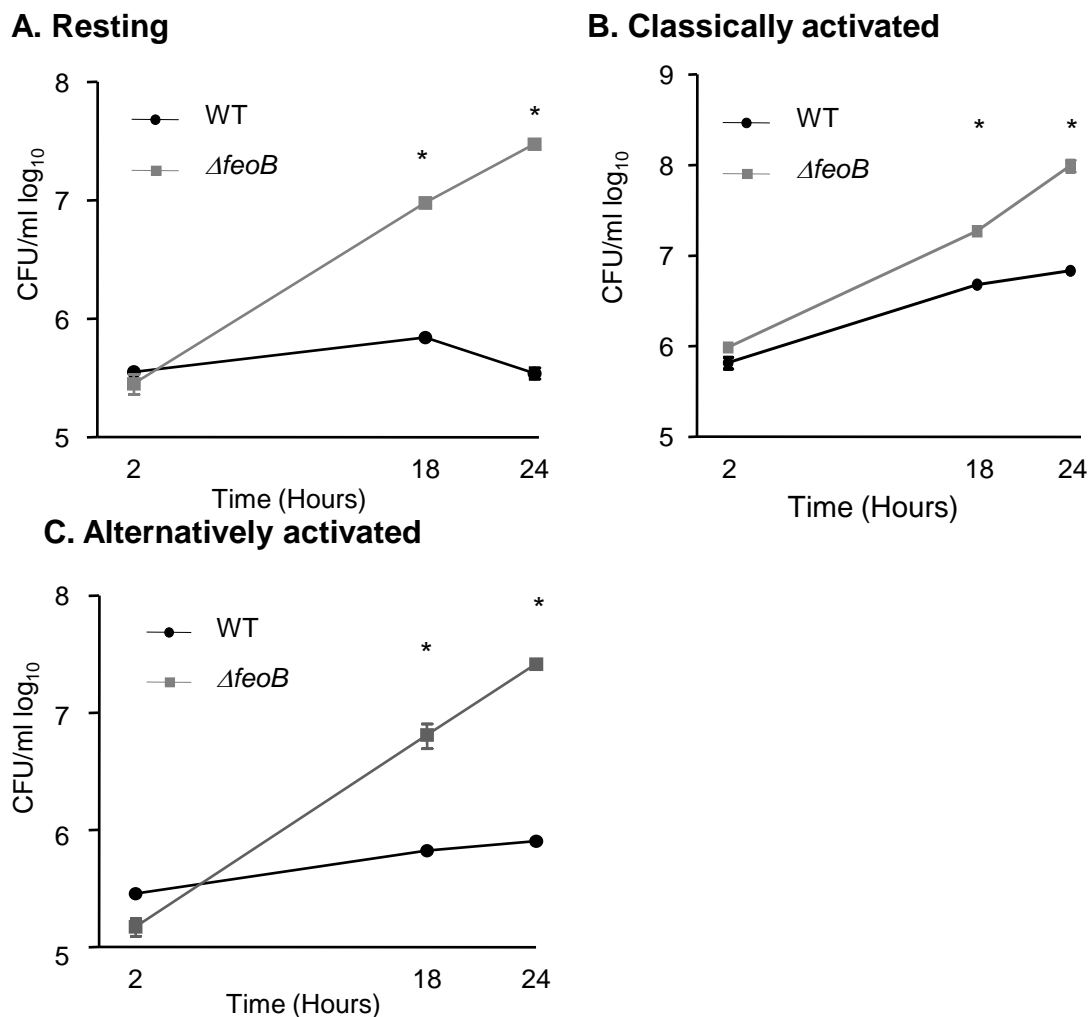

**Figure S1. *S. Typhimurium* strains lacking *feoB* replicate more than wild-type in macrophages.** RAW264.7 Nrp1+ cells that were resting (A) or treated with IFN $\gamma$  and LPS (B) or IL-4 (C) were inoculated with the strains indicated at an MOI of 10. Mean and SD of representative experiments are shown. *P*-values were determined as described in the methods. *P* < 0.05 (\*) vs. WT; n  $\geq$  3 experiments.

## Supplement Figure 2

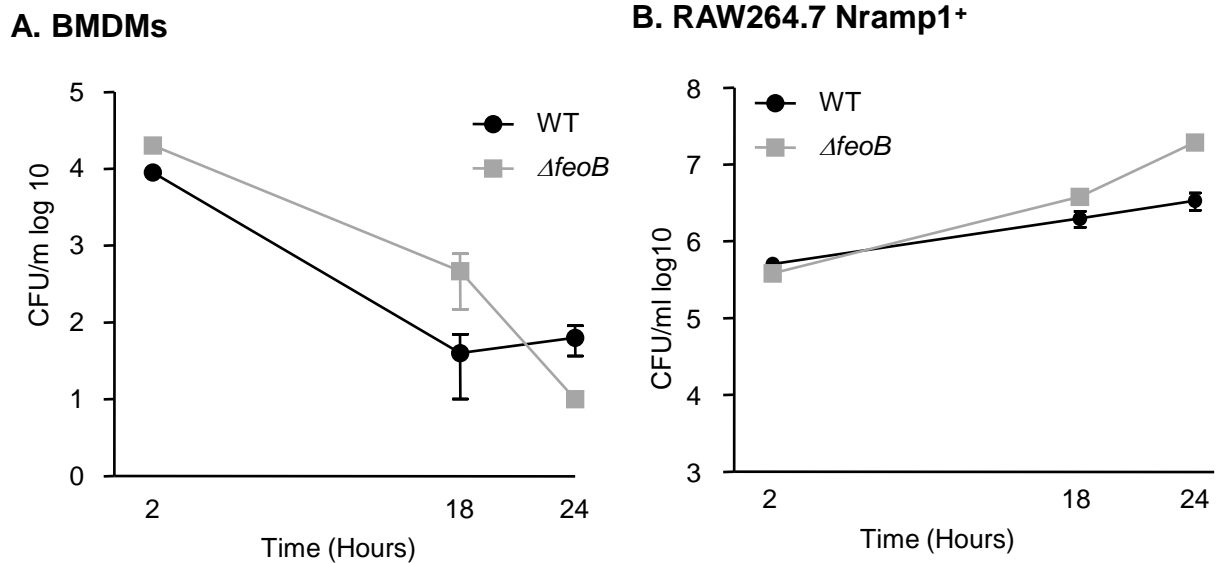

**Figure S2. BMDM are better able to kill *S. Typhimurium* than RAW264.7 Nrpamp1+ cells.** (A) CFU for the individual bacterial strains indicated from a mixed-infection experiment in BMDM treated with IFN $\gamma$  and LPS or RAW264.7 Nrpamp1+ cells (B) are shown. Mean and SD of representative experiments are shown.  $n \geq 3$  experiments.

### Supplement Figure 3

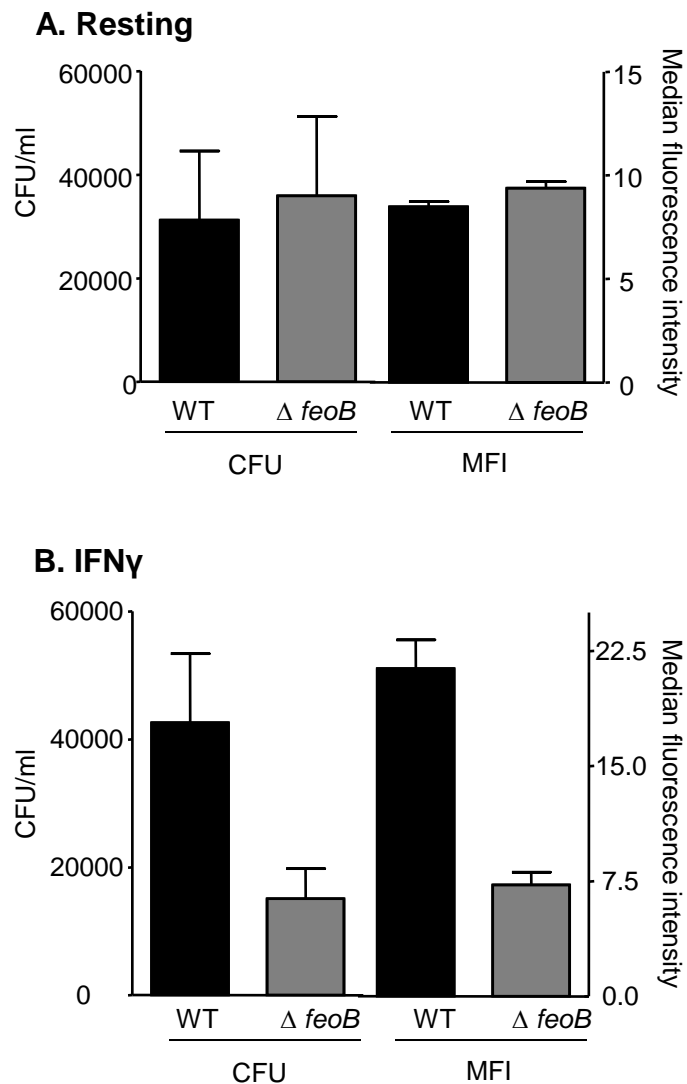

**Figure S3. Median fluorescence intensity is a proxy for *S. Typhimurium* replication.** BMDM were resting (A) or treated with IFN $\gamma$  (B), incubated with erythrocytes at a ratio of 10:1, and then inoculated with a 1:1 mixture of WT-RFP and  $\Delta feoB$ -GFP strains. At 18 hours post-infection,  $\frac{1}{4}$  of the cells were collected for lysis and plating for CFU and  $\frac{3}{4}$  of the cells were fixed and stained with anti-Ter-119 and analyzed by flow cytometry. CFU/ml for the indicated strains are compared with median fluorescence intensity (MFI) of the whole sample. Mean and SD of representative experiments are shown.  $n \geq 3$  experiments.
